# Supplementary material for: A palladium complex of 2,2′-(propane-1,3-diylbis(oxy))dibenzenaminium chloride on SBA-15 as a returnable, environmental and selective nanostructured-catalyst in the Suzuki C–C coupling reaction
Source: Royal Society of Chemistry journal article supplement (doi:10.1039/d5ra08145a), 2026-04-27

## Supplementary Data

### **A palladium complex of 2,2'-(propane-1,3-diylbis(oxy))dibenzenaminium chloride on SBA-15 as a returnable, environmental and selective nanostructured-catalyst in the Suzuki C-C coupling reaction**

**Shirin Mohammadi, Mohsen Nikoorazm\*, Bahman Tahmasbi\*, Yunes Abbasi Tyula**

*Department of Chemistry, Faculty of Science, Ilam University, P. O. Box 69315516, Ilam, Iran.*

*E-mail addresses: m.nikorazm@ilam.ac.ir (M. Nikoorazm), b.tahmasbi@ilam.ac.ir*

### **ABSTRACT**

In this work, mesoporous SBA-15 was synthesized by a simple procedure using P123 and TEOS in HCl acidic conditions, followed by calcination at 550 °C. 2,2'-(propane-1,3-diylbis(oxy))dibenzenaminium chloride ligand (PO(BA)) as ligand was synthesized from 2-nitrophenol and 3,1-dibromopropane, following reduction of nitro groups. The step-by-step synthesis of the PO(BA) ligand was confirmed by <sup>1</sup>H NMR and <sup>13</sup>C NMR. 3-Iodopropyltriethoxysilane (IPTES) was synthesized from 3-chloropropyltriethoxysilane (CPTES) in dry acetone. Then, the mesoporous SBA-15 surface was modified by IPTES and next it was functionalized by PO(BA). Finally, immobilized PO(BA) on SBA-15 became complex with palladium acetate (Pd-PO(BA)@SBA-15). The prepared Pd-PO(BA)@SBA-15 was characterized by SEM, ICP, TGA/DSC EDS, BET/BJH, and WDX techniques. TGA and BET/BJH methods showed high thermal stability of this catalyst up to 230 °C and a high surface area for this catalyst. Then, the catalytic usage of Pd-PO(BA)@SBA-15 was investigated in the selective carbon-carbon bond formation. Various aryl halides (including aryl iodides (Ar-I) and aryl bromides (Ar-Br), having electron-donating or electron-withdrawing functional groups) and some derivatives of phenylboronic acid (such as phenylboronic acid (C<sub>6</sub>H<sub>5</sub>(OH)<sub>2</sub>), 4-methoxyphenylboronic acid and 4-formylphenylboronic acid) were investigated and all biphenyl products were obtained with high yields and TOF values. NMR spectroscopy was used to determine the synthesized biphenyl products. Pd-PO(BA)@SBA-15 catalyst was shown to be reusable without significant loss in its performance in the Suzuki-Miyaura cross-coupling reaction.

**Keywords:** Mesoporous SBA-15, selective nanocatalyst, C-C coupling reaction, palladium complex, reusable catalyst

## NMR spectral data

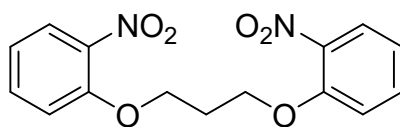

### 1,3-bis(2-nitrophenoxy)propane

$^1\text{H}$  NMR (250 MHz,  $\delta$  ppm DMSO- $d_6$ ): 7.84 (d,  $J=7.5$  Hz, 2H), 7.62 (t,  $J=7.5$  Hz, 2H), 7.34 (d,  $J=7.5$  Hz, 2H), 7.08 (t,  $J=7.5$  Hz, 2H), 4.31 (t,  $J=7.5$  Hz, 4H), 2.20 (quin,  $J=7.5$  Hz, 2H) ppm.

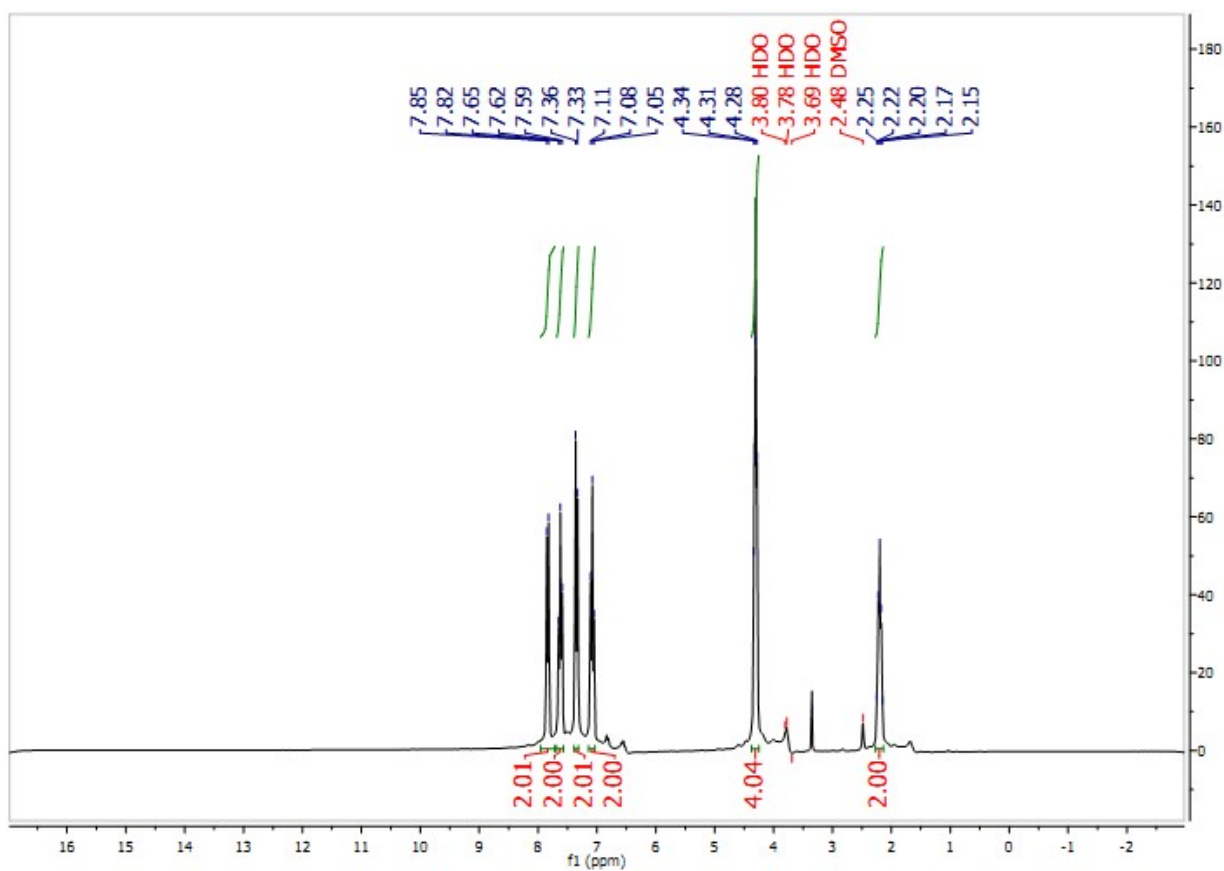

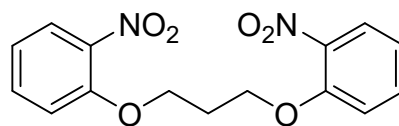

1,3-bis(2-nitrophenoxy)propane

$^{13}\text{C}$  NMR (100 MHz, DMSO- $d_6$ ): 151.6, 139.9, 134.9, 125.4, 121.0, 115.4, 65.9, 28.5 ppm.

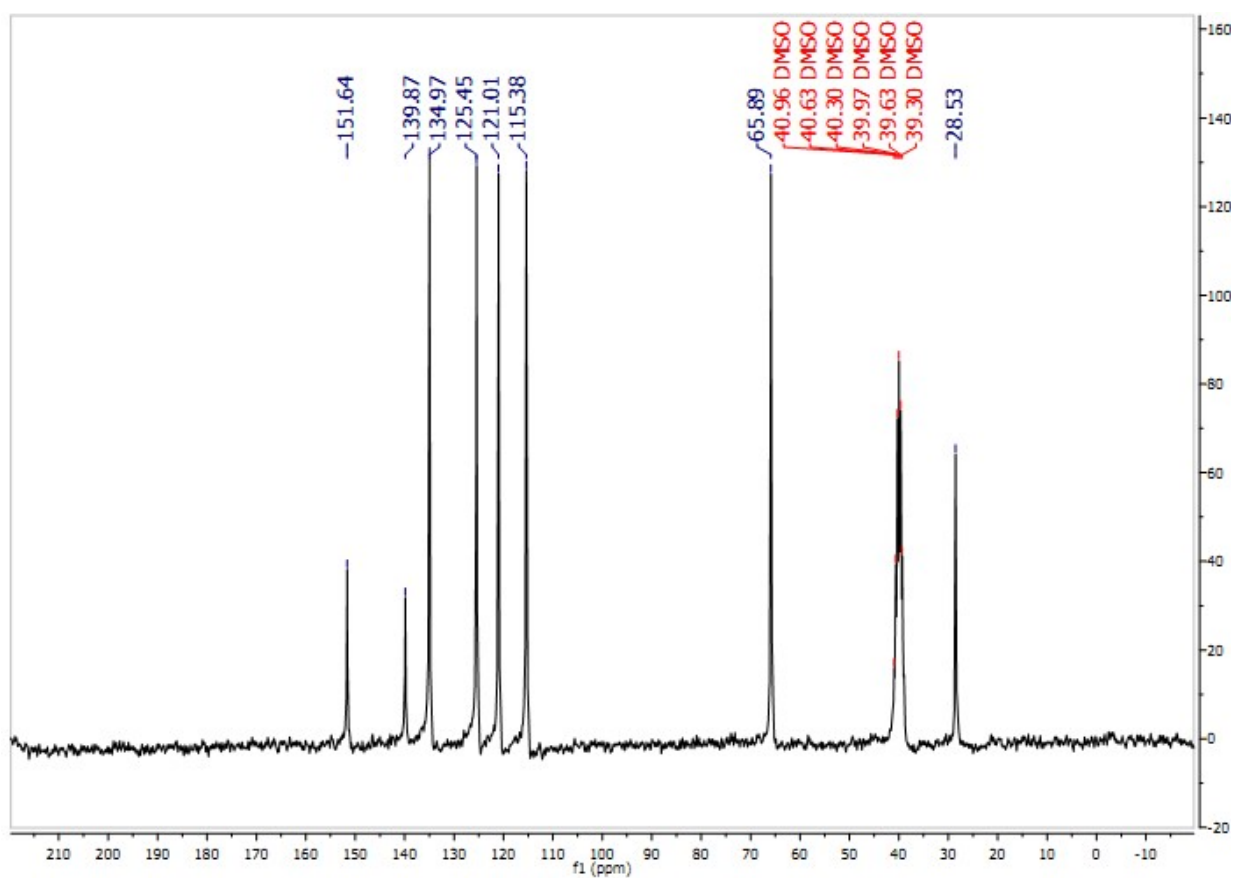

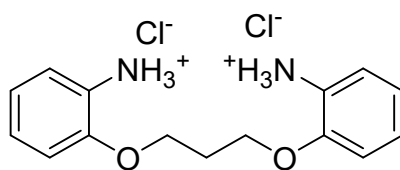

**2,2'-(propane-1,3-diylbis(oxy))dibenzenaminium chloride**

$^1\text{H}$  NMR (250 MHz,  $\delta$  ppm DMSO- $d_6$ ): 7.42-7.38 (m, 2H), 7.36-7.32 (m, 2H), 7.22 (d,  $J= 7.5$  Hz, 2H), 7.00 (t,  $J= 7.5$  Hz, 2H), 4.33 (t,  $J= 5$  Hz, 4H), 3.80 (br, 6H), 2.23 (s, 2H) ppm.

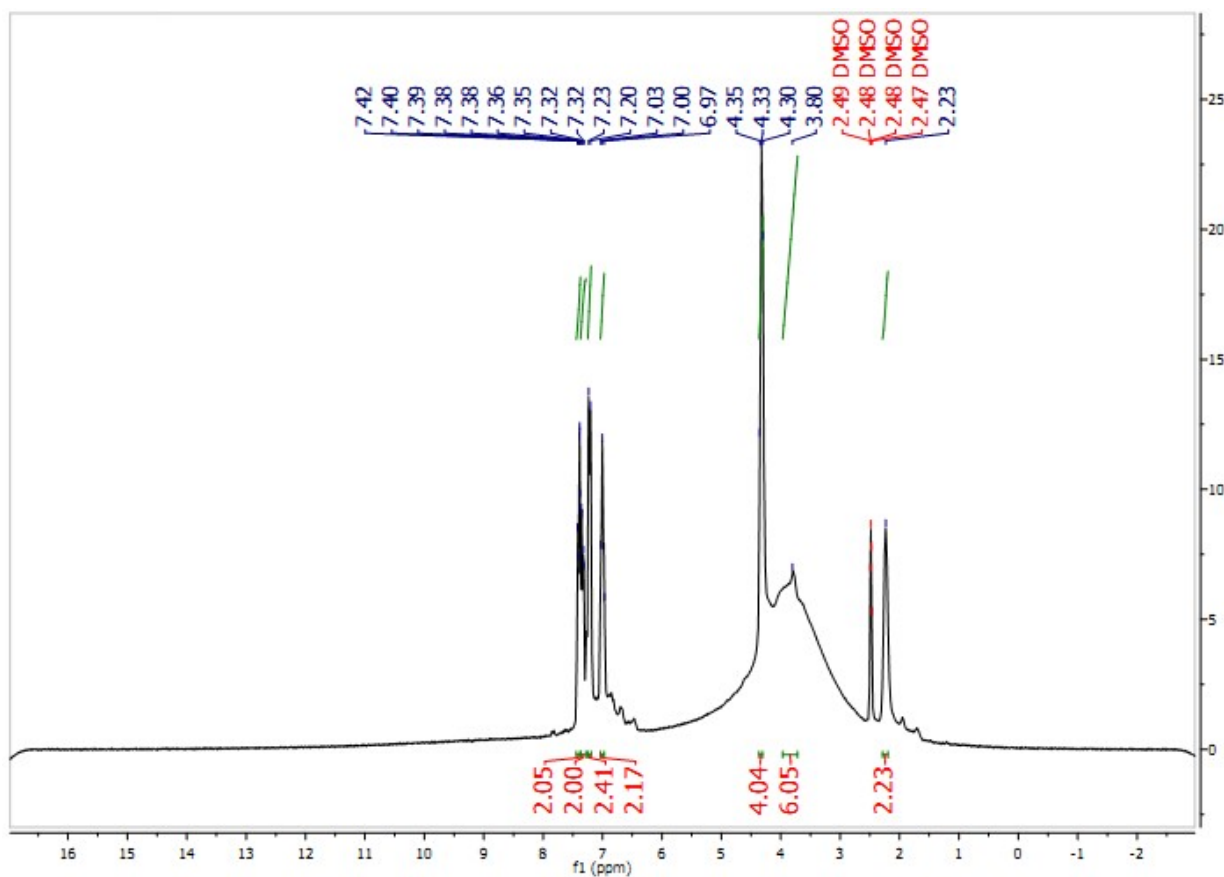

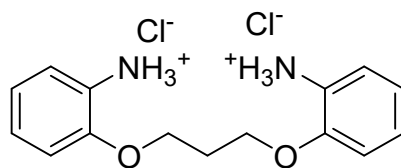

**2,2'-(propane-1,3-diylbis(oxy))dibenzaminium chloride**

$^{13}\text{C}$  NMR (100 MHz,  $\text{DMSO-d}_6$ ): 151.8, 129.7, 124.2, 123.4, 121.0, 113.6, 65.5, 28.7 ppm.

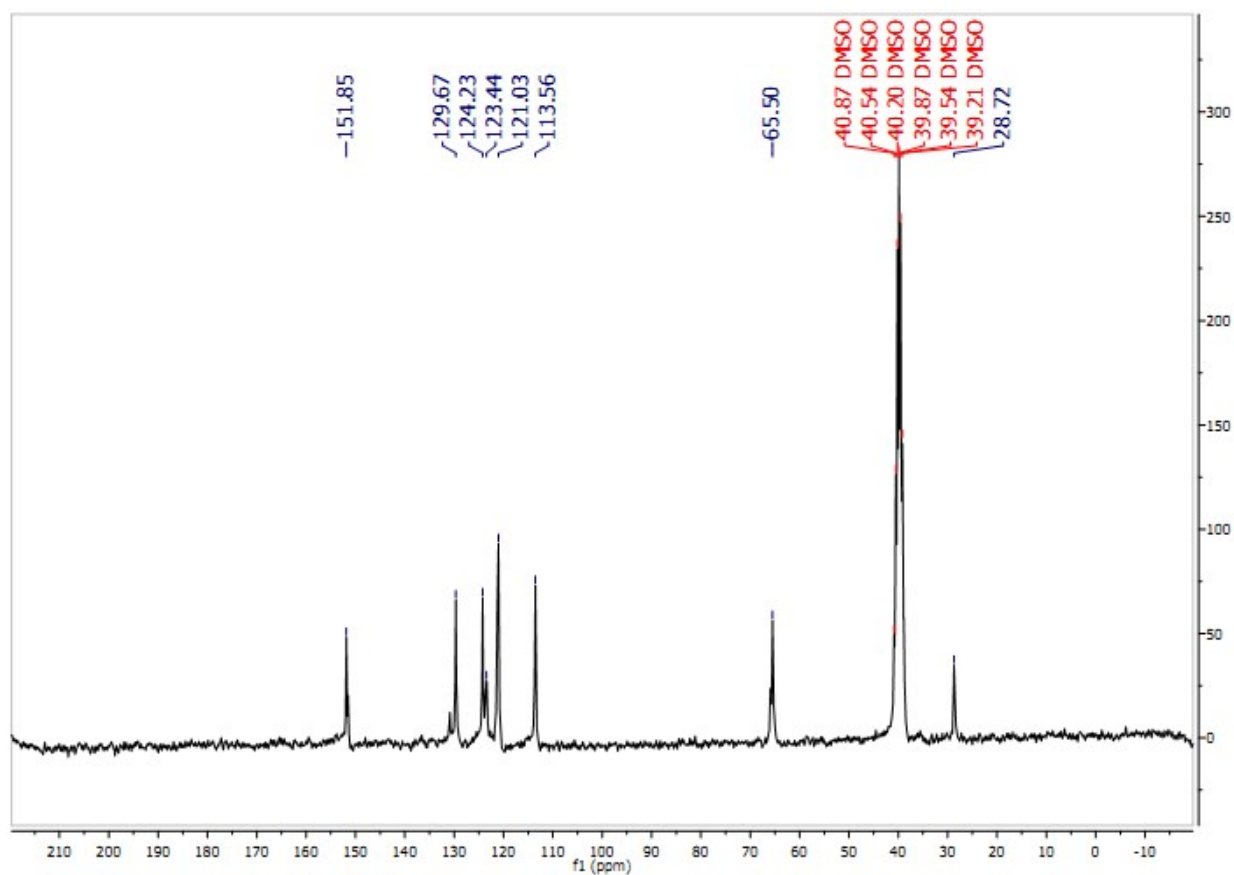

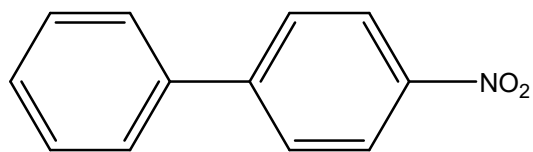

**4-nitro-1,1'-biphenyl**

$^1\text{H}$  NMR (300 MHz,  $\delta$  ppm DMSO- $d_6$ ): 8.29 (d,  $J=9$  Hz, 2H), 7.95 (d,  $J=9$  Hz, 2H), 7.77 (d,  $J=6$  Hz, 2H), 7.56-7.46 (m, 3H) ppm.

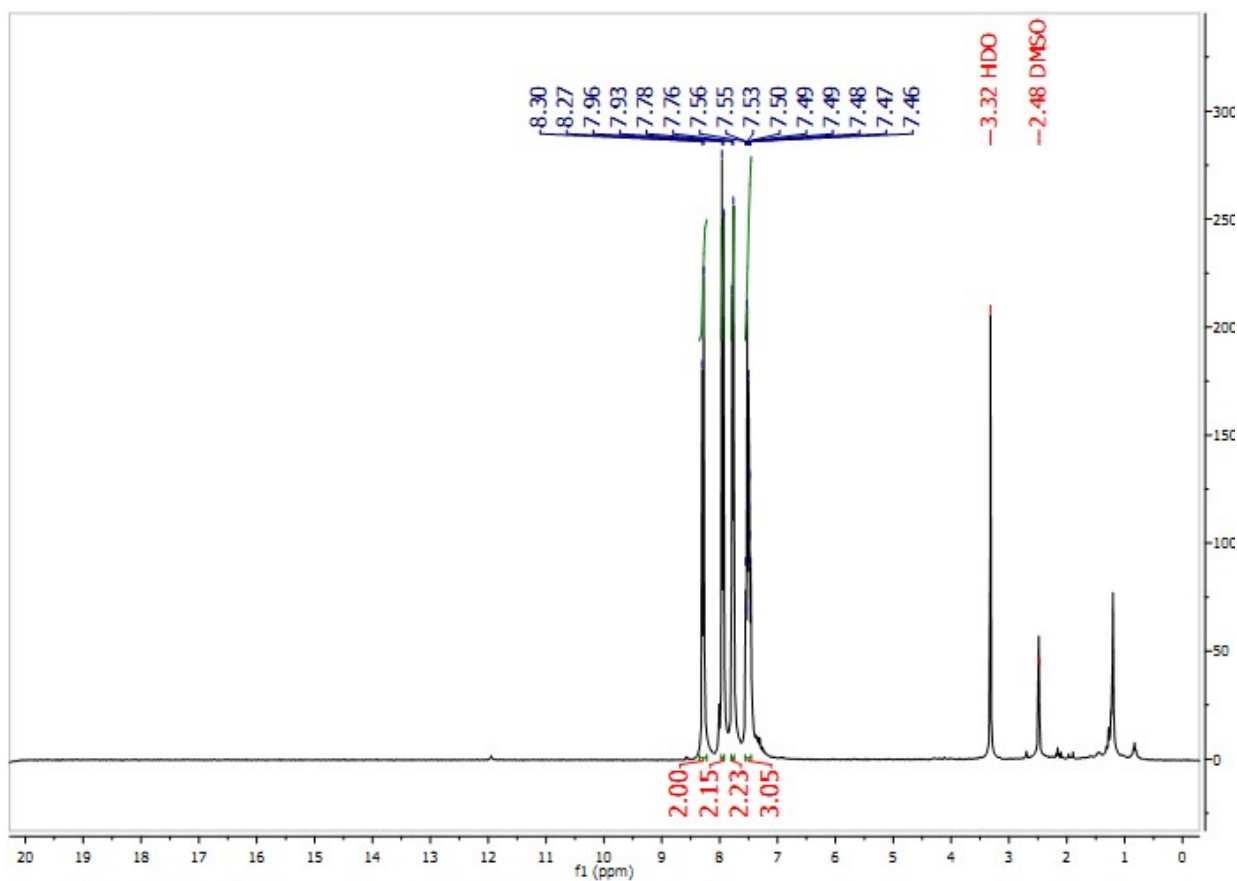

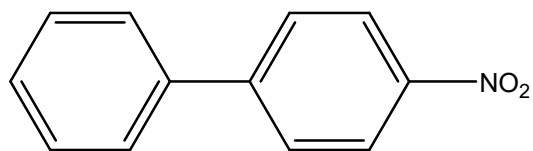

4-nitro-1,1'-biphenyl

$^{13}\text{C}$  NMR (100 MHz,  $\text{CDCl}_3$ ): 147.6, 147.1, 138.8, 129.2, 128.9, 127.8, 127.4, 124.1 ppm.

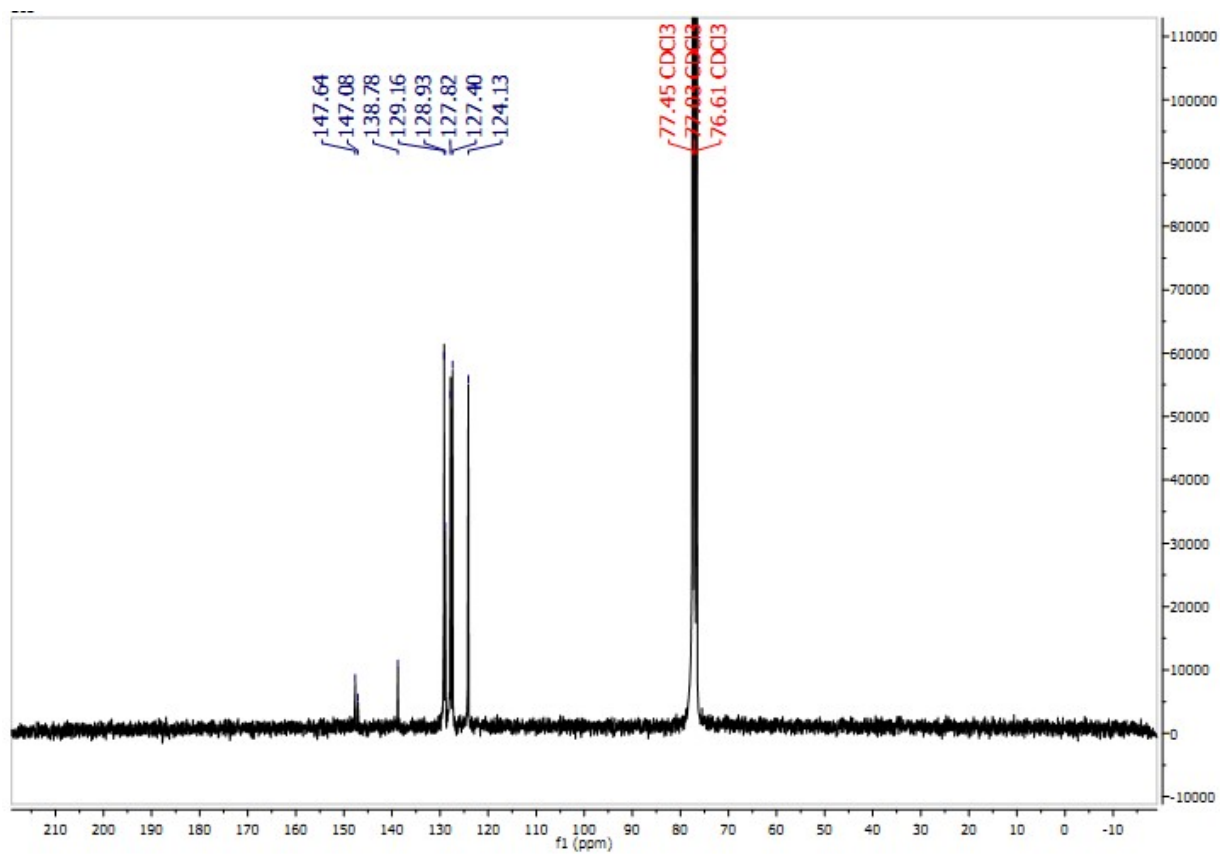

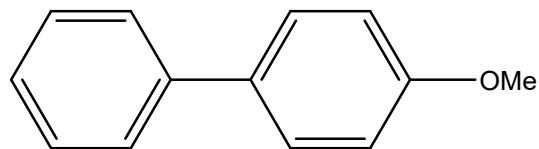

**4-methoxy-1,1'-biphenyl**

$^1\text{H}$  NMR (300 MHz,  $\delta$  ppm DMSO- $d_6$ ): 7.59 (d,  $J = 6$  Hz, 4H), 7.41 (t,  $J = 7.5$  Hz, 2H), 7.29 (t,  $J = 7.5$  Hz, 1H), 7.01 (d,  $J = 9$  Hz, 2H), 3.78 (s, 3H) ppm.

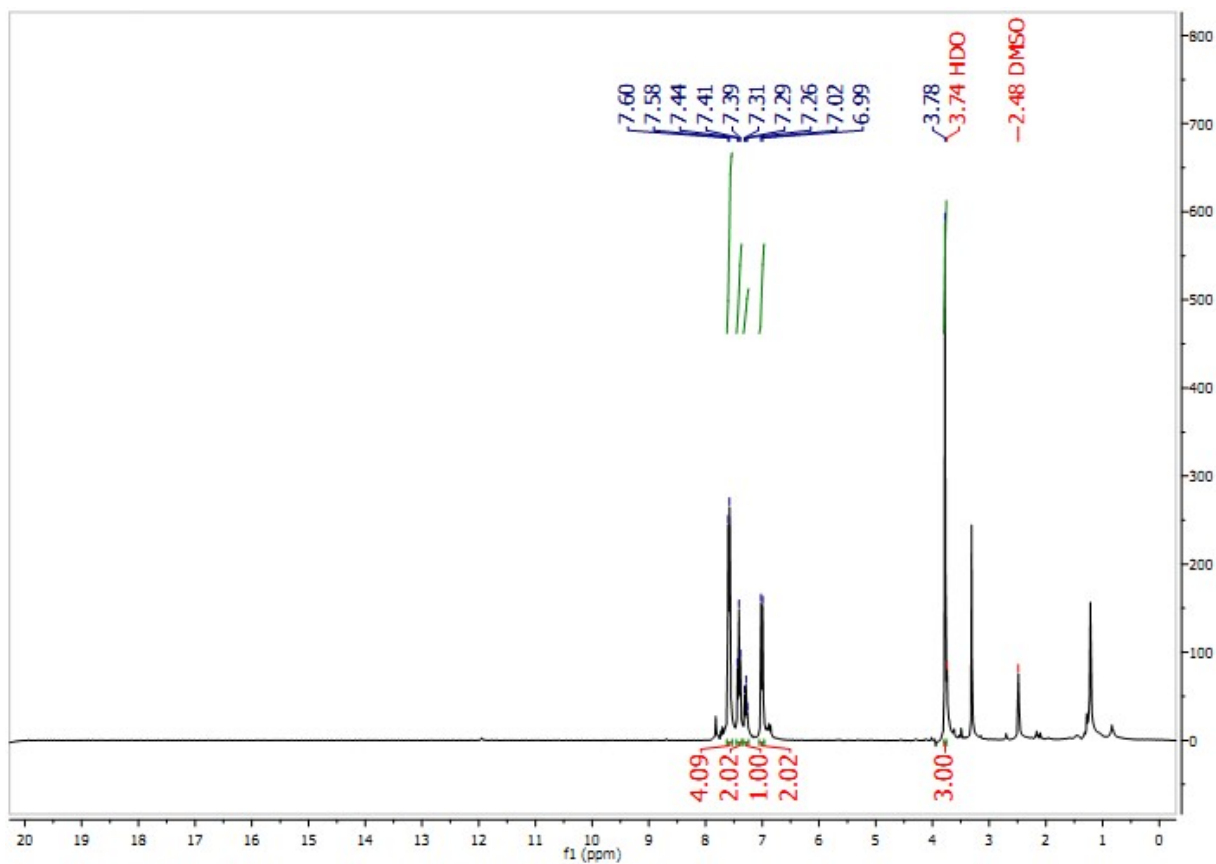

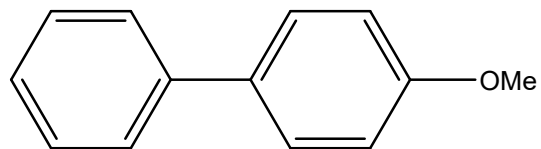

**4-methoxy-1,1'-biphenyl**

$^{13}\text{C}$  NMR (100 MHz,  $\text{CDCl}_3$ ): 159.1, 140.8, 133.8, 128.7, 128.2, 126.8, 126.7, 114.2, 55.4 ppm.

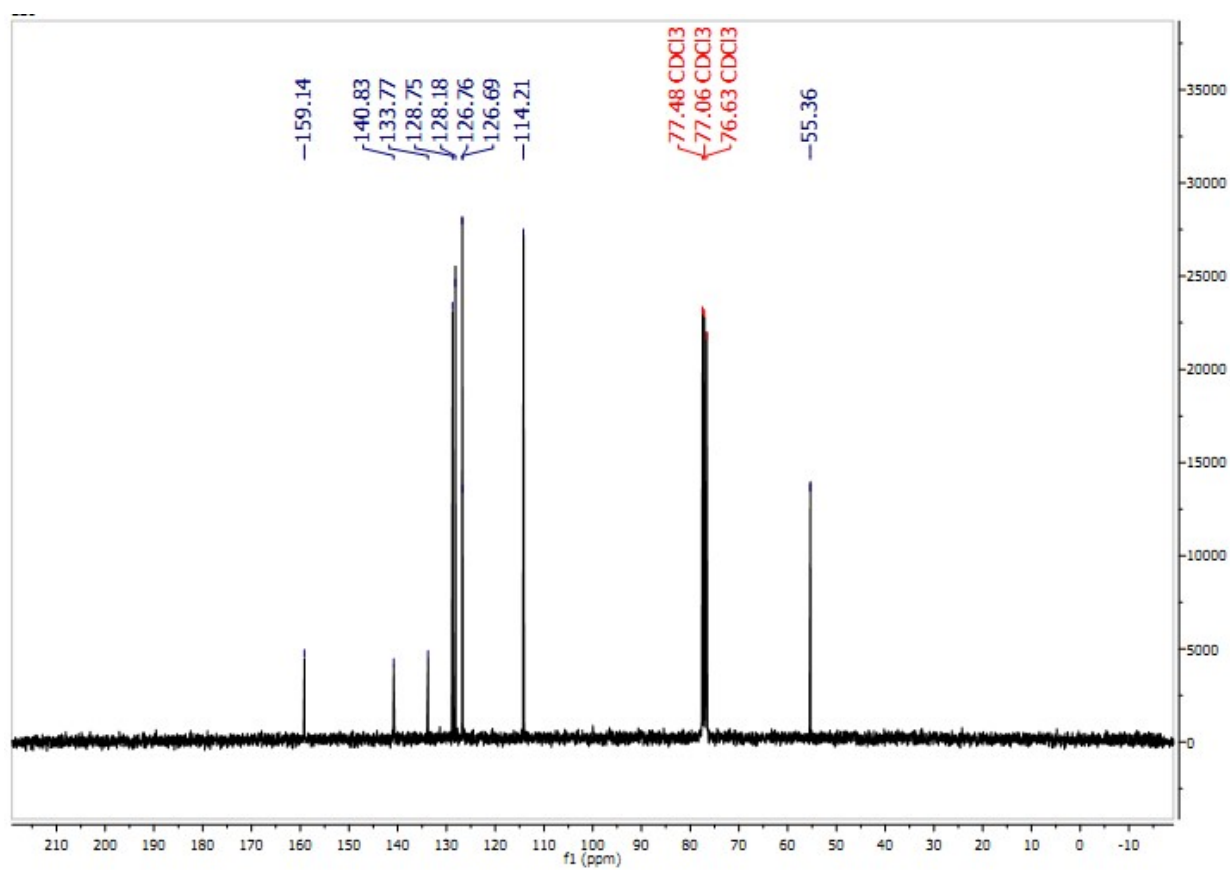

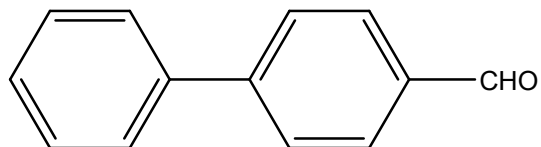

**[1,1'-biphenyl]-4-carbaldehyde**

$^1\text{H}$  NMR (300 MHz,  $\delta$  ppm DMSO- $d_6$ ): 10.04 (s, 1H), 7.98 (d,  $J=9$  Hz, 2H), 7.88 (t,  $J=7.5$  Hz, 2H), 7.75 (d,  $J=6$  Hz, 2H), 7.53-7.40 (m, 3H) ppm.

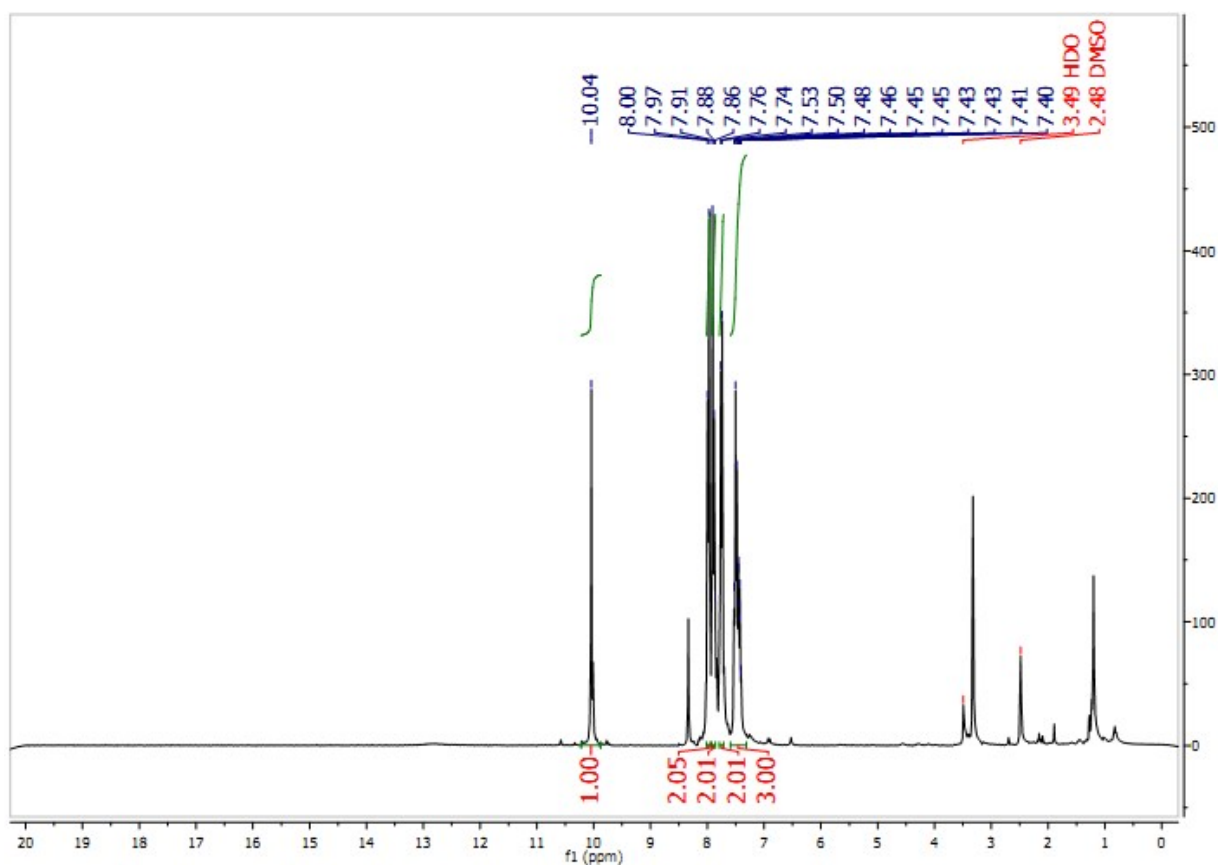

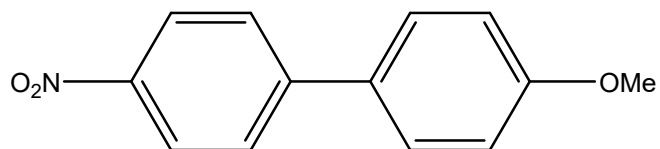

**4-methoxy-4'-nitro-1,1'-biphenyl**

$^1\text{H}$  NMR (300 MHz,  $\delta$  ppm DMSO- $d_6$ ): 8.25 (d,  $J=9$  Hz, 2H), 7.90 (d,  $J=9$  Hz, 2H), 7.75 (d,  $J=9$  Hz, 2H), 7.07 (d,  $J=9$  Hz, 2H), 3.81 (s, 3H) ppm.

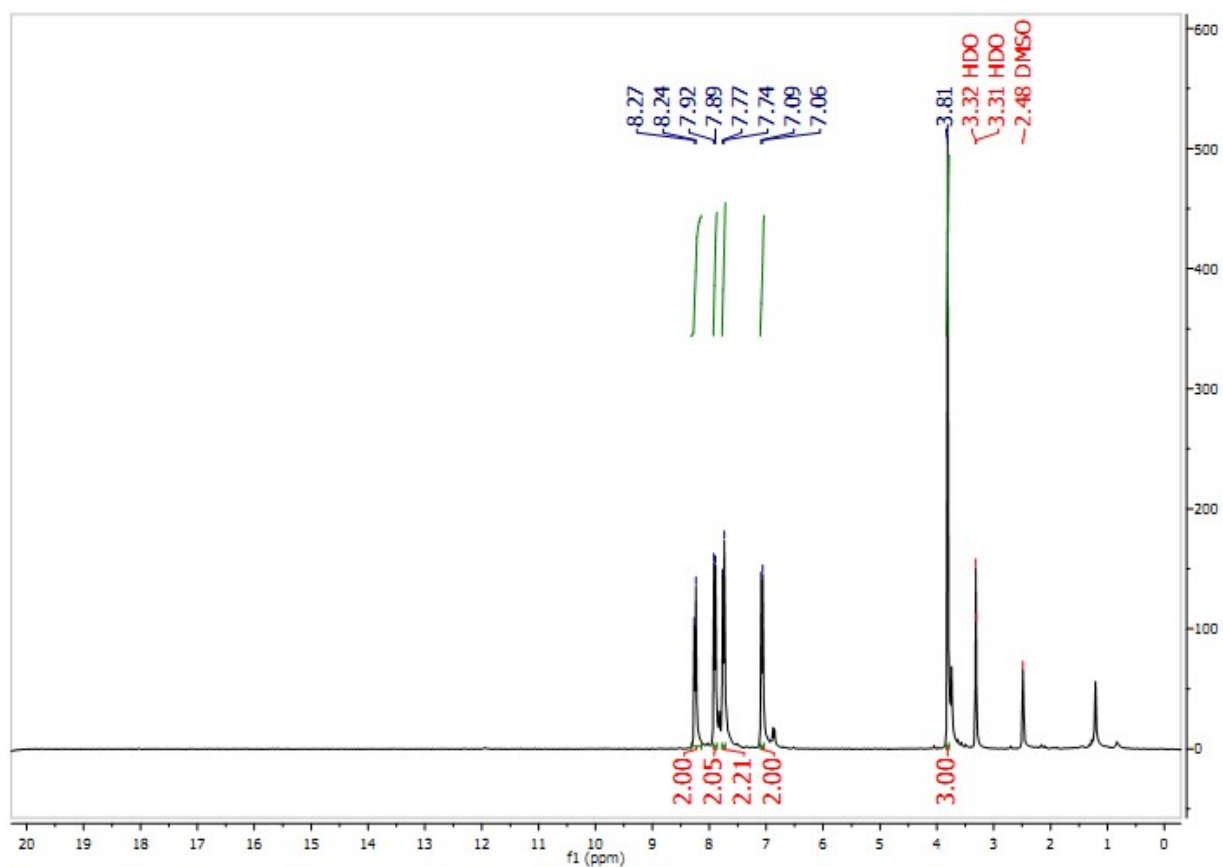

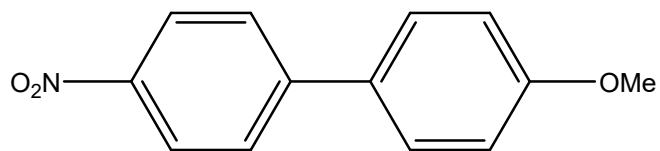

**4-methoxy-4'-nitro-1,1'-biphenyl**

$^{13}\text{C}$  NMR (100 MHz,  $\text{CDCl}_3$ ): 160.4, 147.2, 146.5, 131.0, 128.6, 127.1, 124.1, 114.6, 55.4 ppm.

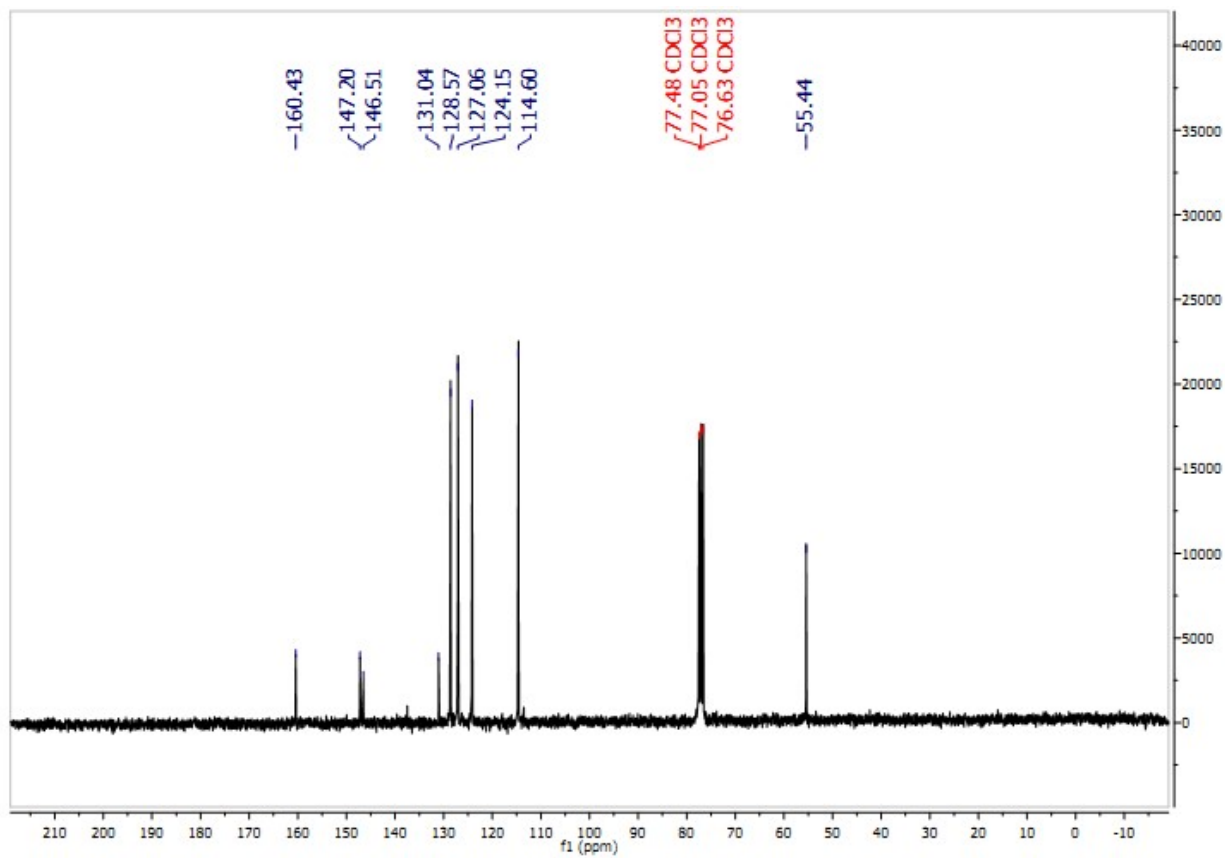

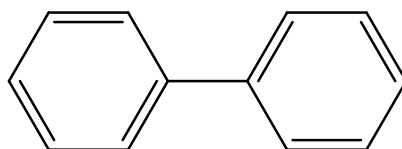

**1,1'-biphenyl**

$^1\text{H}$  NMR (300 MHz,  $\delta$  ppm  $\text{CDCl}_3$ ): 7.63 (d,  $J=9$  Hz, 4H), 7.48 (t,  $J=6$  Hz, 4H), 7.39 (d,  $J=9$  Hz, 2H) ppm.

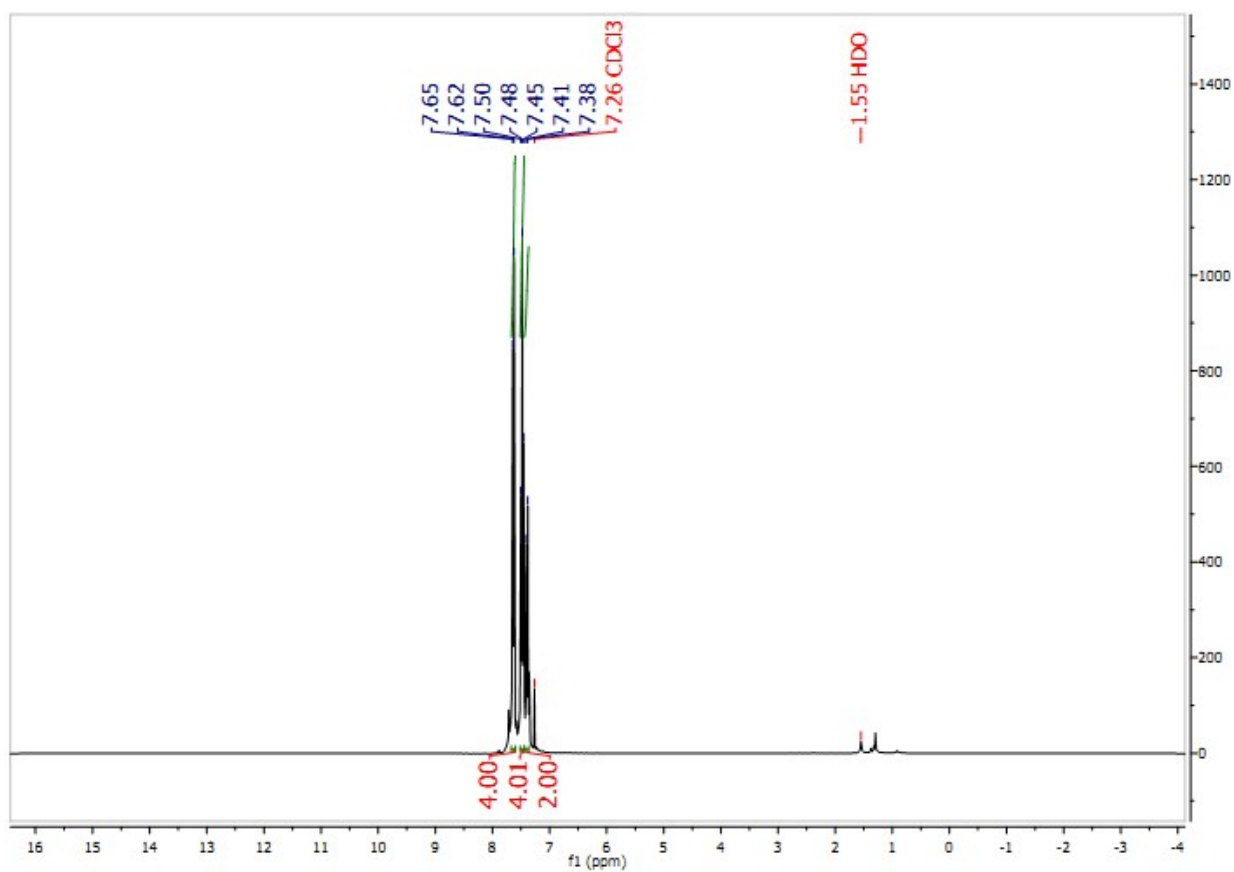

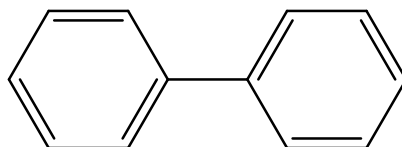

**1,1'-biphenyl**

$^{13}\text{C}$  NMR (100 MHz,  $\text{CDCl}_3$ ): 141.3, 128.8, 127.3, 127.2 ppm.

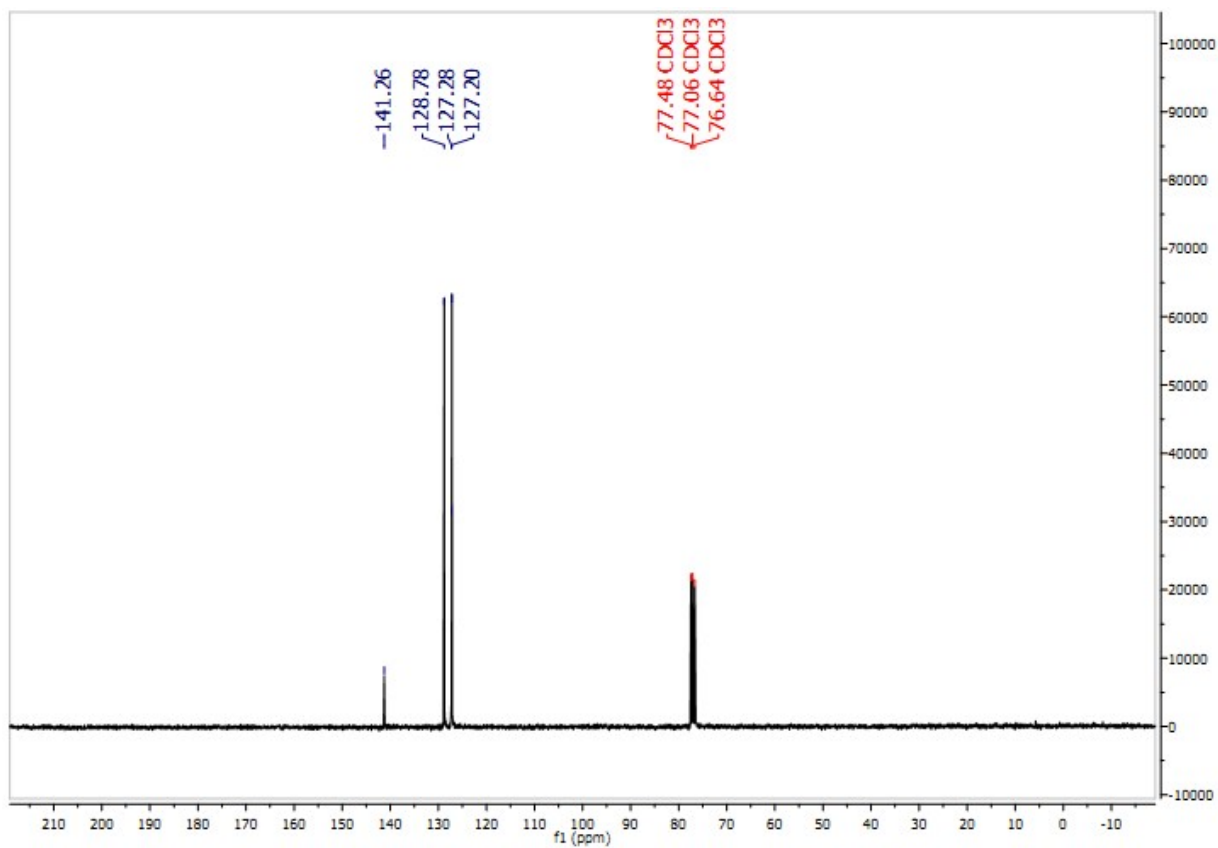

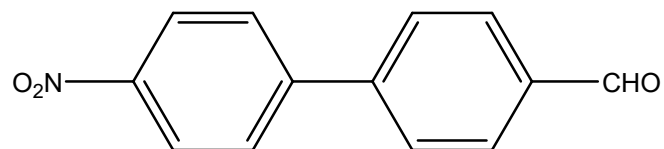

**4'-nitro-[1,1'-biphenyl]-4-carbaldehyde**

$^1\text{H NMR}$  (300 MHz,  $\delta$  ppm  $\text{CDCl}_3$ ): 10.09 (s, 1H), 8.34 (d,  $J=9$  Hz, 2H), 8.02 (d,  $J=9$  Hz, 2H), 7.80 (d,  $J=9$  Hz, 4H) ppm.

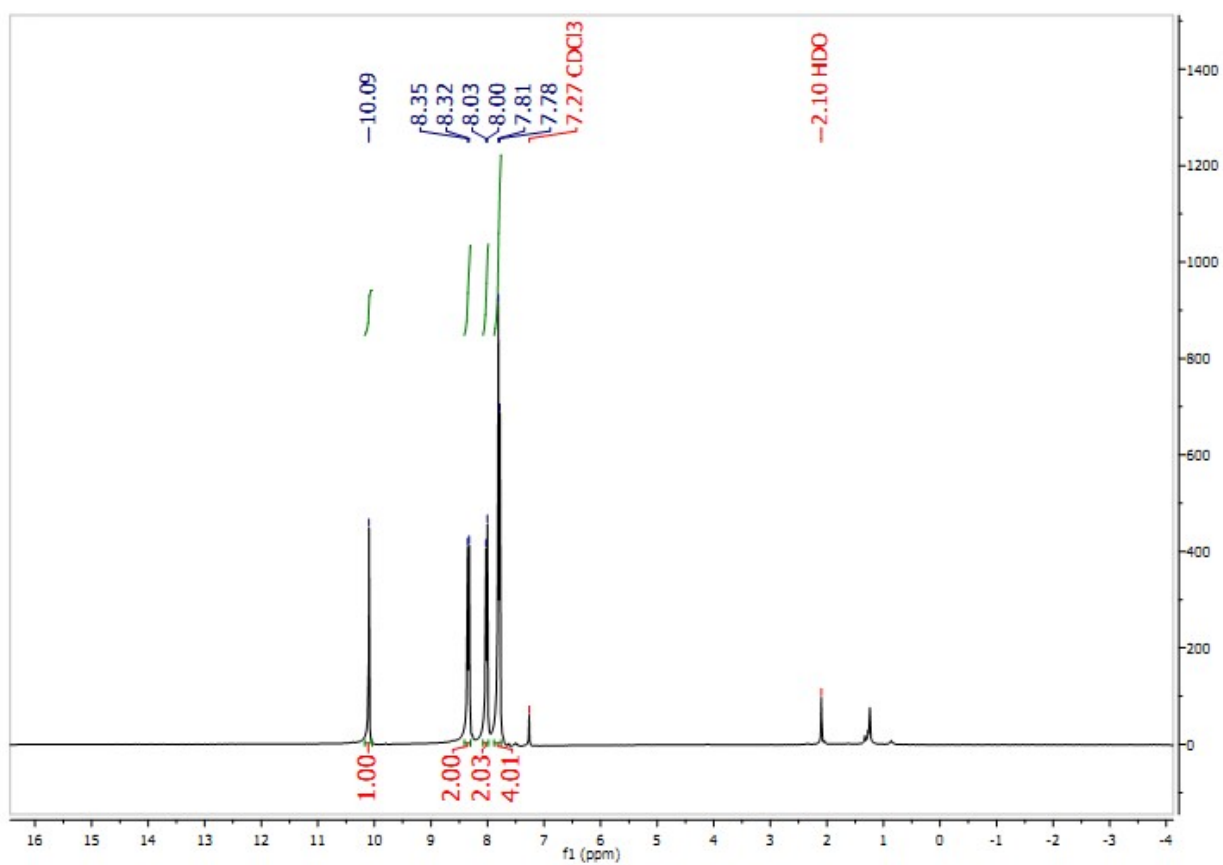



**4'-nitro-[1,1'-biphenyl]-4-carbaldehyde**

$^{13}\text{C}$  NMR (100 MHz,  $\text{CDCl}_3$ ): 191.7, 147.7, 146.0, 144.5, 136.2, 130.5, 128.2, 128.1, 124.3 ppm.

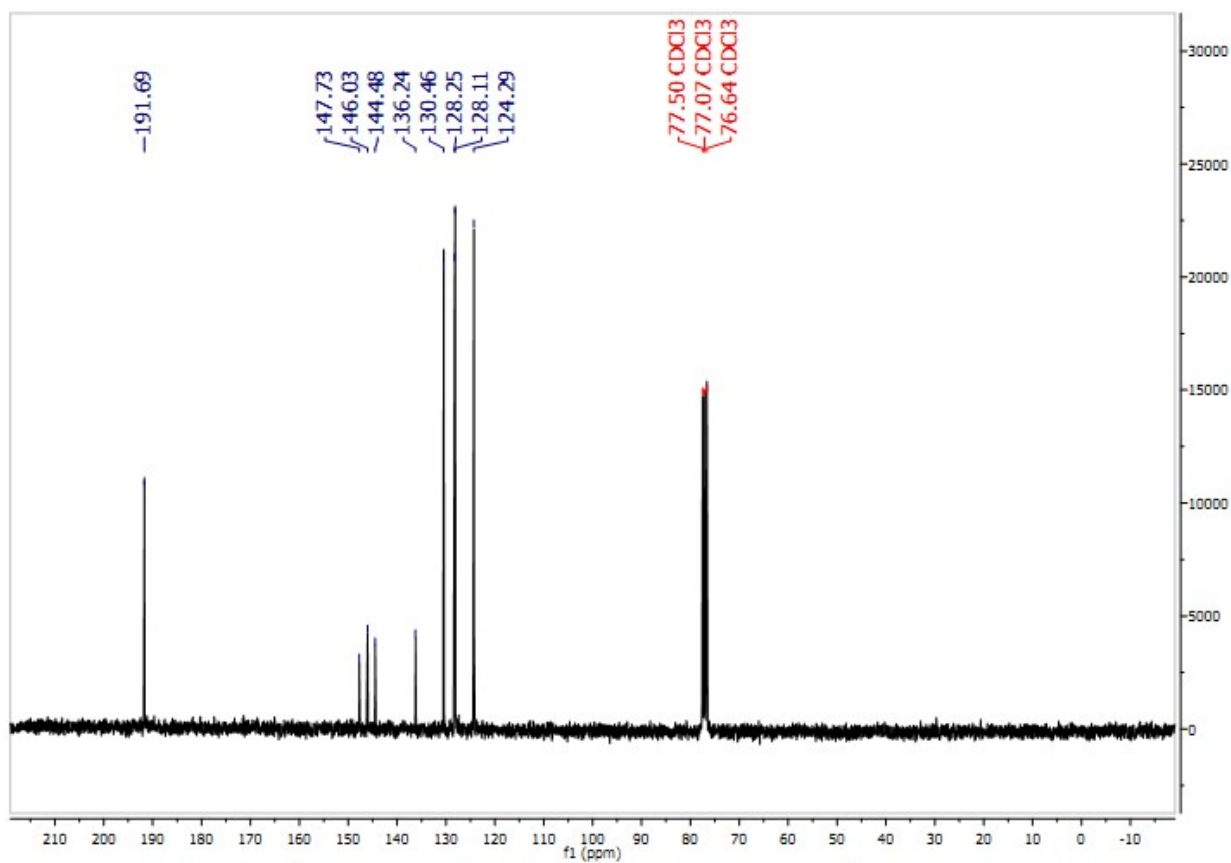

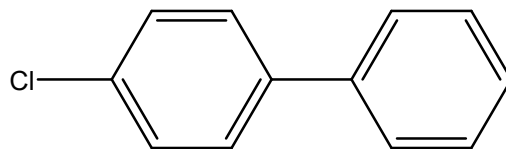

**4-chloro-1,1'-biphenyl**

$^1\text{H}$  NMR (300 MHz,  $\delta$  ppm  $\text{CDCl}_3$ ): 7.58-7.52 (m, 4H), 7.46 (t,  $J=9$  Hz, 4H), 7.40 (t,  $J=3$  Hz, 1H) ppm.

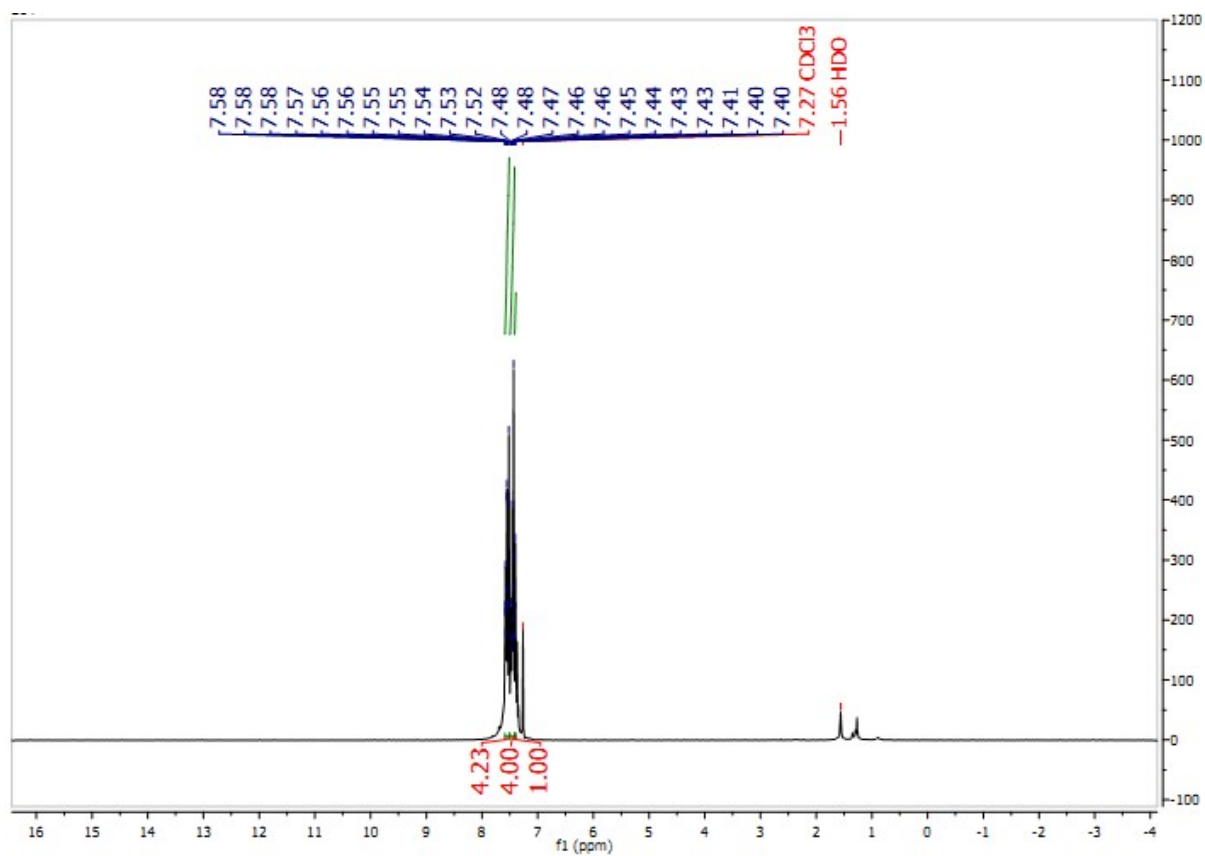



**4-chloro-1,1'-biphenyl**

$^{13}\text{C}$  NMR (100 MHz,  $\text{CDCl}_3$ ): 140.0, 139.7, 133.4, 128.9, 128.9, 128.4, 127.6, 127.0 ppm.

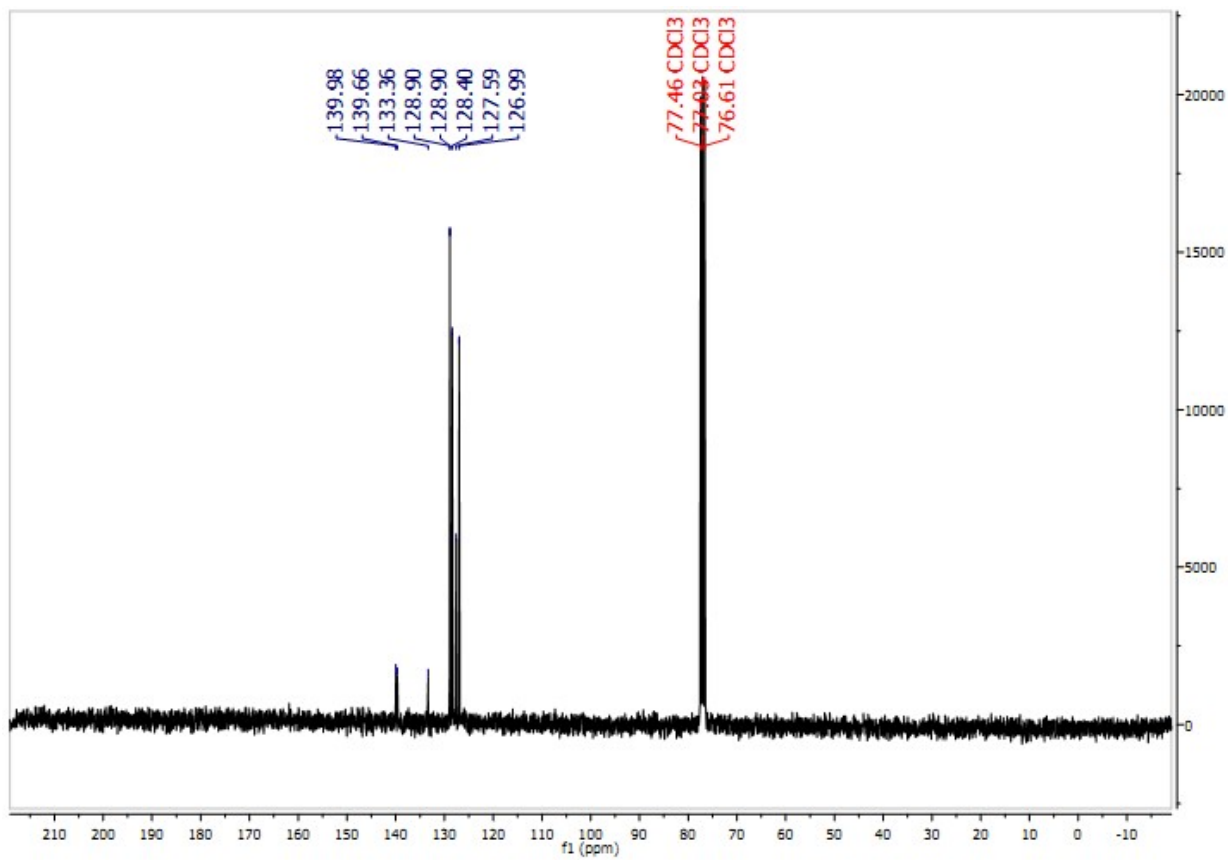

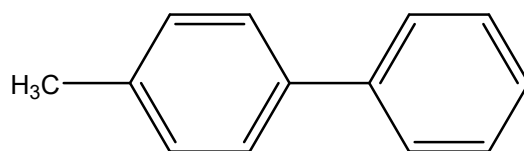

**4-methyl-1,1'-biphenyl**

$^1\text{H}$  NMR (300 MHz,  $\delta$  ppm  $\text{CDCl}_3$ ): 7.62 (d,  $J = 9$  Hz, 2H), 7.53 (d,  $J = 6$  Hz, 2H), 7.46 (t,  $J = 6$  Hz, 2H), 7.35 (t,  $J = 6$  Hz, 1H), 7.28 (t,  $J = 9$  Hz, 2H), 2.43 (s, 3H) ppm.

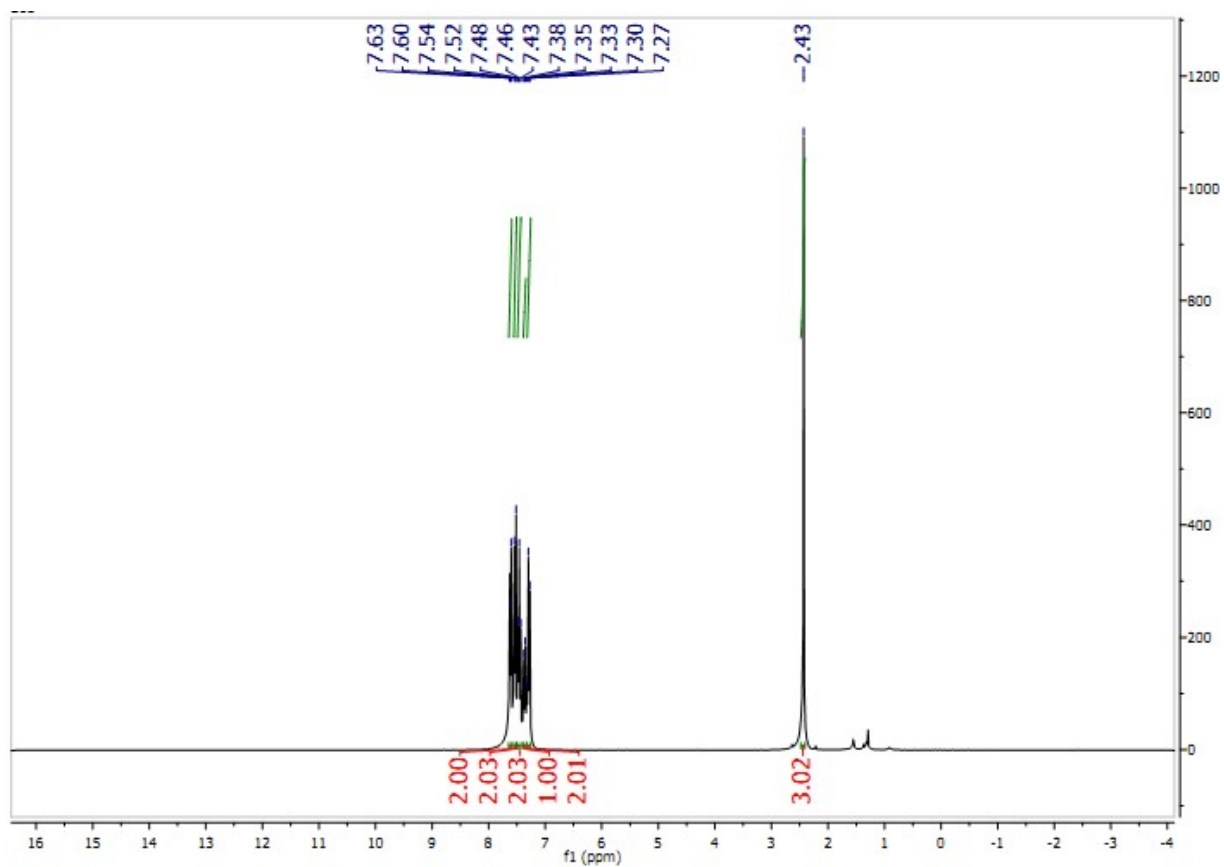

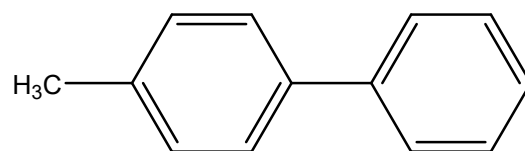

4-methyl-1,1'-biphenyl

$^{13}\text{C}$  NMR (100 MHz,  $\text{CDCl}_3$ ): 141.2, 138.4, 137.0, 129.5, 128.7, 127.0, 127.0, 21.1 ppm.

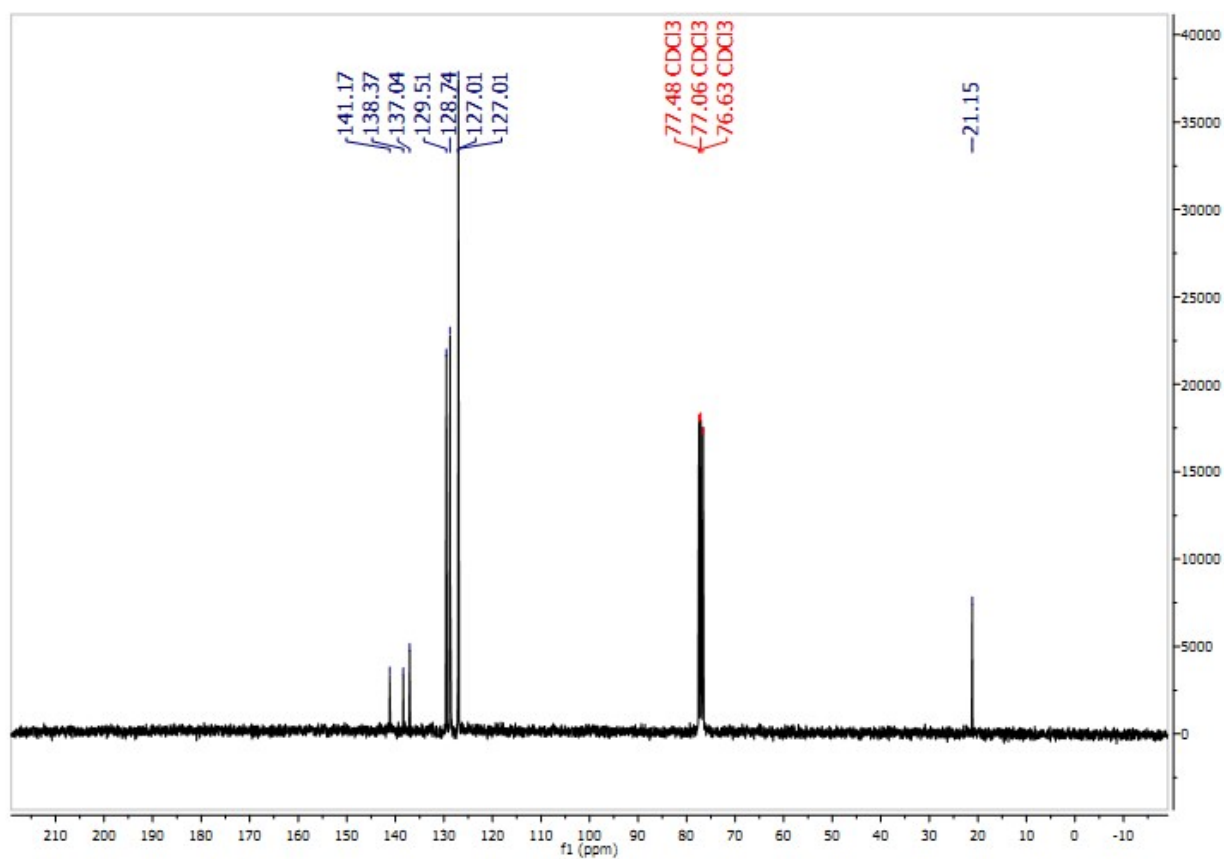

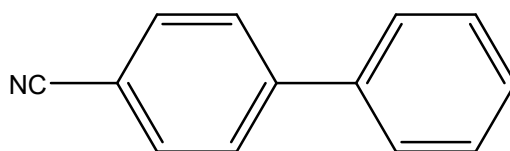

[1,1'-biphenyl]-4-carbonitrile

$^1\text{H}$  NMR (300 MHz,  $\delta$  ppm  $\text{CDCl}_3$ ): 7.73 (d,  $J=9$  Hz, 2H), 7.68 (d,  $J=9$  Hz, 2H), 7.60 (d,  $J=9$  Hz, 2H), 7.52-7.43 (m, 3H) ppm.

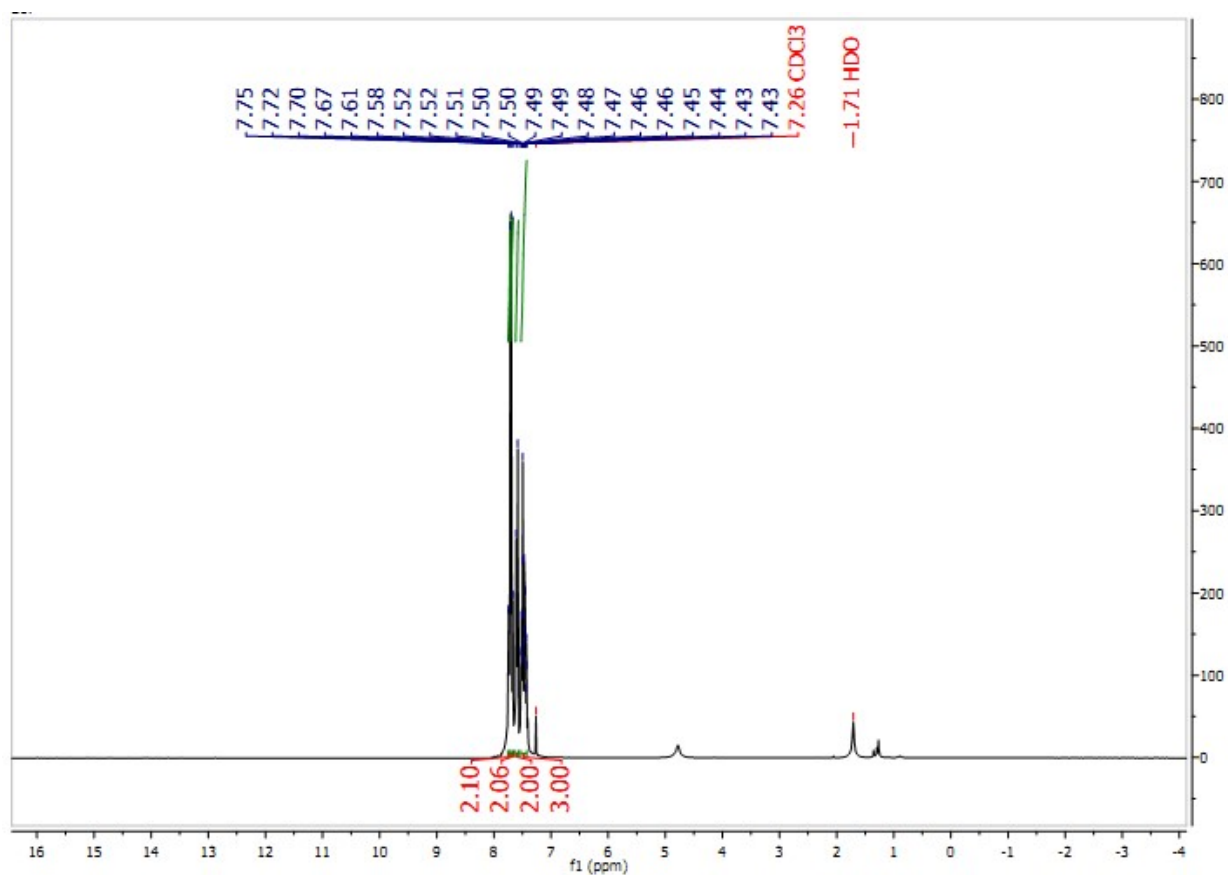



[1,1'-biphenyl]-4-carbonitrile

$^{13}\text{C}$  NMR (100 MHz,  $\text{CDCl}_3$ ): 145.7, 139.1, 132.6, 129.1, 128.7, 127.7, 127.2, 119.0, 110.9 ppm.

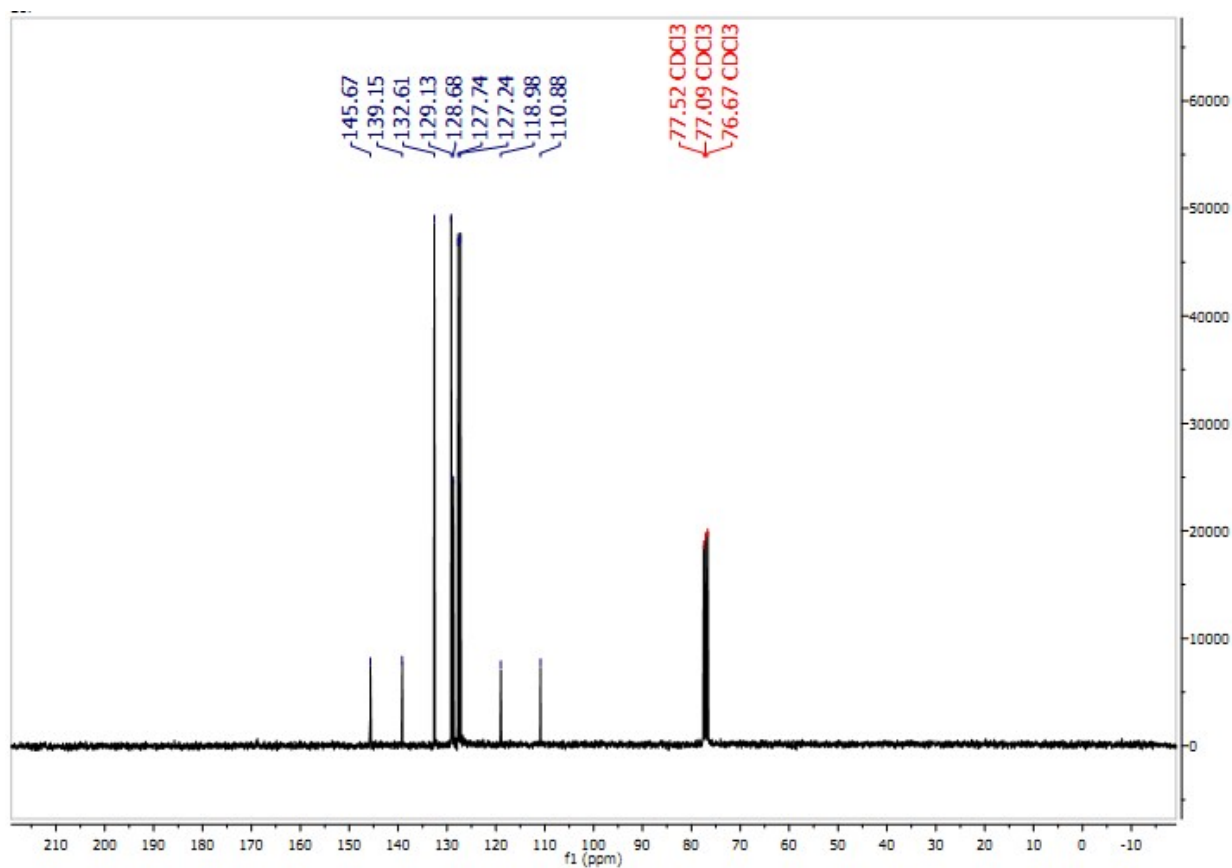

Supplement: d5ra08145a1.pdf [file d5ra08145a1.pdf]
